# Supplementary material for: Development and preliminary validation of a systemic lupus erythematosus-specific quality-of-life instrument (SLEQOL)
Source: Oxford University Press journal article supplement (doi:10.1093/rheumatology/keh605), 2005-03-29
Supplement: keh605_Supplementary_Data.zip [file keh605_Supplementary_Data.zip]

Archive with 1 entries (1 files):
- keh605supp_data.pdf
